# Supplementary material for: Diels–Alder Adducts of Morphinan-6,8-Dienes and Their Transformations
Source: MDPI journal article supplement (doi:10.3390/molecules27092863), 2022-04-30
Supplement: s1 [file s1]

Supplementary Material

# Diels-Alder Adducts of Morphinan-6,8-dienes and their Transformations

János Marton <sup>1\*</sup>, Anikó Fekete <sup>2</sup>, Paul Cumming <sup>3,4</sup> Sándor Hosztafi <sup>5</sup>, Pál Mikecz <sup>2</sup>,

and

Gjermund Henriksen <sup>6,7,8\*</sup>

<sup>1</sup> ABX advanced biochemical compounds Biomedizinische Forschungsreagenzien GmbH, Heinrich-Glaeser-Strasse 10-14, D-01454 Radeberg, Germany; marton@abx.de

<sup>2</sup> Division of Nuclear Medicine and Translational Imaging, Department of Medical Imaging, Faculty of Medicine, University of Debrecen, Nagyerdei krt. 98, H-4032 Debrecen, Hungary; feke.te.aniko@science.unideb.hu (A.F.); mikecz.pal@unideb.hu (P.M.)

<sup>3</sup> Department of Nuclear Medicine, Bern University Hospital, Freiburgstraße 18, CH-3010 Bern, Switzerland; paul.cumming@insel.ch

<sup>4</sup> School of Psychology and Counselling, Queensland University of Technology, Brisbane, Australia

<sup>5</sup> Institute of Pharmaceutical Chemistry, Semmelweis Medical University, Hőgyes Endre utca 9, H-1092 Budapest, Hungary; hosztafi.sandor@pharma.semmelweis-univ.hu

<sup>6</sup> Norwegian Medical Cyclotron Centre Ltd., Sognsvannsveien 20, N-0372 Oslo, Norway; gjermund.henriksen@syklotronsenteret.no

<sup>7</sup> Institute of Basic Medical Sciences, University of Oslo, P. O. Box 1105, Blindern, N-0317 Oslo, Norway

<sup>8</sup> Institute of Physics, University of Oslo, Sem Saelands vei 24, N-0371 Oslo, Norway

## ORCID ID

|                              |                     |
|------------------------------|---------------------|
| Dr. János Marton             | 0000-0001-9411-7899 |
| Dr. Anikó Fekete             | 0000-0002-0951-6092 |
| Prof. Dr. Paul Cumming       | 0000-0002-0257-9621 |
| Dr. Sándor Hosztafi PhD, DSc | 0000-0003-3793-4651 |
| Dr. Pál Mikecz               | 0000-0003-4367-7460 |
| Prof. Dr. Gjermund Henriksen | 0000-0001-9608-9895 |

## \* CORRESPONDENCE

### Dr. János Marton

ABX advanced biochemical compounds Biomedizinische Forschungsreagenzien GmbH  
Heinrich-Glaeser-Strasse 10-14  
D-01454 Radeberg, Germany  
Email: marton@abx.de

### Prof. Dr. Gjermund Henriksen

Norwegian Medical Cyclotron Centre Ltd.  
Sognsvannsveien 20,  
N-0372 Oslo, Norway  
Email: gjermund.henriksen@syklotronsenteret.no  
Phone: +47-950-351-78

---

CONTENTS

---

|      |                                                                                                                                                                  | PAGE |
|------|------------------------------------------------------------------------------------------------------------------------------------------------------------------|------|
| 1.   | ABBREVIATIONS                                                                                                                                                    | 3    |
| 2.   | SUPPLEMENTARY FIGURES                                                                                                                                            | 7    |
| 2.1. | Figure S1      Synthesis of $^{17}\text{N}$ -northevinone                                                                                                        | 7    |
| 2.2. | Figure S2      Reaction of 20-phenethyl-thevinol with diethyl azodicarboxylate                                                                                   | 7    |
| 2.3. | Figure S3 $\text{N}^{17}$ -demethylation of thevinone using the <i>von</i> Braun method                                                                          | 8    |
| 2.4. | Figure S4      The Hudlický route for preparation of buprenorphine methylether                                                                                   | 8    |
| 2.5. | Figure S5      Synthesis of BPN methylether from 20- <i>tert</i> -butyl-dihydrothevinol using the <i>N</i> -demethylation/ <i>N</i> -acylation reaction sequence | 8    |
| 2.6. | Figure S6      Synthesis of buprenorphine from oripavine                                                                                                         | 9    |
| 2.7. | Figure S7      Synthesis of $\text{N}^{17}$ -cyclopropylmethyl-nororipavine from oripavine                                                                       | 9    |
| 2.8. | Figure S8      Chemical structures of non-acid-sensitive 6,14-ethenomorphinans 3- <i>O</i> -demethylated with boron tribromide                                   | 9    |

---

## 1. ABBREVIATIONS

| Compound, Term, Acronym  | Comp. | Name, Synonyms                                                                                                                                                                                                                                                                                                                             |
|--------------------------|-------|--------------------------------------------------------------------------------------------------------------------------------------------------------------------------------------------------------------------------------------------------------------------------------------------------------------------------------------------|
| 6,14-amidoHap            | 251   | 6,14-amido heroin hapten                                                                                                                                                                                                                                                                                                                   |
| 14-amidoMorHap           | 255   | 14-amido morphine hapten                                                                                                                                                                                                                                                                                                                   |
| 14-amidoHerHap           | 256   | 14-amido heroin hapten                                                                                                                                                                                                                                                                                                                     |
| Banyu compound-24 (C-24) | -     | (2 <i>R</i> )-1-(phenylmethyl)- <i>N</i> -(3-spiro[1 <i>H</i> -2-benzofuran-3,4'-piperidine]-1'-ylpropyl)pyrrolidine-2-carboxamide; CAS RN: [475150-69-7]                                                                                                                                                                                  |
| BBB                      | -     | blood brain barrier                                                                                                                                                                                                                                                                                                                        |
| benzyne                  | -     | aryne; highly reactive species derived from an aromatic ring by removing two substituents                                                                                                                                                                                                                                                  |
| BHT                      | -     | 2,6-di- <i>tert</i> -butyl-4-methylphenol, 2,6-di- <i>tert</i> -butyl- <i>p</i> -cresol, CAS RN: [128-37-0]                                                                                                                                                                                                                                |
| Boc                      | -     | <i>tert</i> -butoxycarbonyl group                                                                                                                                                                                                                                                                                                          |
| BPN                      | 96    | buprenorphine, CAS RN: [52485-79-7]                                                                                                                                                                                                                                                                                                        |
| [ <sup>11</sup> C]BPN    | 460b  | [ <sup>11</sup> C]buprenorphine, [6- <i>O</i> -methyl- <sup>11</sup> C]buprenorphine                                                                                                                                                                                                                                                       |
| BrCN                     | -     | cyanogen bromide, CAS RN: [506-68-3]                                                                                                                                                                                                                                                                                                       |
| BU08028                  | 101   | (5 <i>R</i> ,6 <i>R</i> ,7 <i>R</i> ,9 <i>R</i> ,13 <i>S</i> ,14 <i>S</i> ,20 <i>S</i> )-17-cyclopropylmethyl- $\alpha$ -(1,1-dimethylpropyl)-4,5 $\alpha$ -epoxy-18,19-dihydro-3-hydroxy-6-methoxy- $\alpha$ -methyl-6,14-ethenomorphinan-7-methanol, CAS RN: [1333904-22-5]                                                              |
| BU127                    | 396g  | <i>N</i> <sup>17</sup> -cyclopropyl-20 <i>S</i> -phenyl-dihydronorvinol; (5 <i>R</i> ,6 <i>R</i> ,7 <i>R</i> ,9 <i>R</i> ,13 <i>S</i> ,14 <i>S</i> ,20 <i>S</i> )-17-(cyclopropylmethyl)-4,5 $\alpha$ -epoxy-18,19-dihydro-3-hydroxy-6-methoxy- $\alpha$ -methyl- $\alpha$ -phenyl-6,14-ethenomorphinan-7-methanol; CAS RN: [1417783-62-0] |
| BU128                    | -     | (5 <i>R</i> ,6 <i>R</i> ,7 <i>R</i> ,9 <i>R</i> ,13 <i>S</i> ,14 <i>R</i> ,20 <i>R</i> )-17-(cyclopropylmethyl)-4,5-epoxy-3-hydroxy-6-methoxy-7-methyl- $\alpha$ -phenyl-6,14-ethenomorphinan-7-methanol<br>CAS RN: [1417783-82-4]                                                                                                         |
| BU10112                  | -     | (1' <i>R</i> ,5 $\alpha$ ,6 <i>R</i> ,7 <i>R</i> ,14 $\alpha$ )-1'-(3-methylphenyl-1'-(4,5 $\alpha$ -epoxy-7,8-dihydro-3-hydroxy-6-methoxy-7 $\beta$ -methyl-17-cyclopropylmethyl-6,14-ethenomorphinan-7-yl)-methan-1'-ol, CAS RN: [1417783-97-1]                                                                                          |
| BU10119                  | 102   | (5 <i>R</i> ,6 <i>R</i> ,7 <i>R</i> ,9 <i>R</i> ,13 <i>S</i> ,14 <i>S</i> ,20 <i>R</i> )-17-(cyclopropylmethyl)-4,5-epoxy-18,19-dihydro-3-hydroxy-6-methoxy-7-methyl- $\alpha$ -phenyl-6,14-ethenomorphinan-7-methanol<br>CAS RN: [1417783-94-8]                                                                                           |
| BU10120                  | 103   | (5 <i>R</i> ,6 <i>R</i> ,7 <i>R</i> ,9 <i>R</i> ,13 <i>S</i> ,14 <i>S</i> ,20 <i>R</i> )-17-(cyclopropylmethyl)-4,5-epoxy-3-hydroxy-6-methoxy-7-methyl- $\alpha$ -(4-fluorophenyl)-6,14-ethenomorphinan-7-methanol<br>CAS RN: [1417783-90-4]                                                                                               |
| Caf                      | -     | carfentanil, 1-(2-phenylethyl)-4-[(1-oxopropyl)phenylamino]-4-piperidine carboxylic acid methyl ester, R-31,833, 4-carboxymethyl-fentanyl,<br>CAS RN: [59708-52-09]                                                                                                                                                                        |
| [ <sup>11</sup> C]Caf    | -     | [ <sup>11</sup> C]carfentanil, CAS: [122402-12-4]                                                                                                                                                                                                                                                                                          |
| Cbz                      | -     | benzyloxycarbonyl group, Z                                                                                                                                                                                                                                                                                                                 |
| CNS                      | -     | central nervous system                                                                                                                                                                                                                                                                                                                     |
| COSY                     | -     | correlated spectroscopy, two-dimensional shift correlations via spin-spin coupling                                                                                                                                                                                                                                                         |
| CPCO                     | -     | cyclopropylcarbonyl group                                                                                                                                                                                                                                                                                                                  |
| CPM                      | -     | cyclopropylmethyl group                                                                                                                                                                                                                                                                                                                    |
| Cypre                    | -     | cyprenorphine, RX285M, 17-cyclopropylmethyl-4,5-epoxy-3-hydroxy-6-methoxy- $\alpha$ , $\alpha$ -dimethyl-6,14-ethenomorphinan-7-methanol,<br>CAS RN: [44065-22-8]                                                                                                                                                                          |
| DA reaction              | -     | Diels-Alder reaction                                                                                                                                                                                                                                                                                                                       |
| DAMGO                    | -     | Tyr- <i>D</i> -Ala-Gly-( <i>N</i> Me)Phe-Gly-ol                                                                                                                                                                                                                                                                                            |
| DBU                      | -     | 1,8-diazabicyclo[5.4.0]undec-7-ene, CAS RN: [6674-22-2]                                                                                                                                                                                                                                                                                    |
| DBN                      | -     | 1,5-diazabicyclo[4.3.0]non-5-ene, CAS RN: [3001-72-7]                                                                                                                                                                                                                                                                                      |
| DEAD                     | -     | diethyl azodicarboxylate, CAS RN: [1972-28-7]                                                                                                                                                                                                                                                                                              |
| DHE                      | -     | dihydroetorphine, CAS RN: [14357-76-7]                                                                                                                                                                                                                                                                                                     |
| DIBAL                    | -     | diisobutylaluminum hydride CAS RN: [1191-15-7]                                                                                                                                                                                                                                                                                             |
| dihydrothevinone         | 104   | 4,5 $\alpha$ -epoxy-18,19-dihydro-17-methyl-3,6-dimethoxy-7 $\alpha$ -acetyl-6,14-ethenomorphinan, CAS RN: [16196-82-0]                                                                                                                                                                                                                    |

| Compound, Term, Acronym              | Comp. | Name, Synonyms                                                                                                                                                                                                          |
|--------------------------------------|-------|-------------------------------------------------------------------------------------------------------------------------------------------------------------------------------------------------------------------------|
| DIPEA                                | -     | ethyl-diisopropylamine, <i>N,N</i> -diisopropylamine, Hünig's base                                                                                                                                                      |
| 9,10-DMA                             | 201   | 9,10-dimethylantracene, CAS RN: [781-43-1]                                                                                                                                                                              |
| DMAD                                 | -     | dimethyl acetylenedicarboxylate, CAS RN: [762-42-5]                                                                                                                                                                     |
| DMAP                                 | -     | <i>N,N</i> -dimethylpyridin-4-amine, 4-dimethylaminopyridine, CAS RN: [1122-58-3]                                                                                                                                       |
| DMF                                  | -     | <i>N,N</i> -dimethylformamide                                                                                                                                                                                           |
| DMP                                  | -     | Des-Martin periodane                                                                                                                                                                                                    |
| DMSO                                 | -     | dimethyl sulfoxide, (CH <sub>3</sub> ) <sub>2</sub> SO, CAS RN: [67-68-5]                                                                                                                                               |
| δ-OR                                 | -     | δ-opioid receptor                                                                                                                                                                                                       |
| DPDPE                                | -     | [ <i>D</i> -Pen <sup>2</sup> , <i>D</i> -Pen <sup>5</sup> ]enkephalin, CAS RN: [88373-73-3]                                                                                                                             |
| DPN                                  | 95    | diprenorphine, Revivon, M5050, CAS RN: [14357-78-9]                                                                                                                                                                     |
| [ <sup>11</sup> C]DPN                | 460a  | [ <sup>11</sup> C]diprenorphine, [6- <i>O</i> -methyl- <sup>11</sup> C]diprenorphine                                                                                                                                    |
| ED <sub>50</sub>                     | -     | effective dose                                                                                                                                                                                                          |
| EDG substituent                      | -     | electron donating substituent                                                                                                                                                                                           |
| EDTA                                 | -     | ethylenediaminetetracetic acid, CAS RN: [60-00-4]                                                                                                                                                                       |
| ε-OR                                 | -     | ε-opioid receptor                                                                                                                                                                                                       |
| EP                                   | -     | ethyl propiolate, ethyl acetylenecarboxylate, CAS RN: [623-47-2]                                                                                                                                                        |
| EWG substituent                      | -     | electron withdrawing substituent                                                                                                                                                                                        |
| FAO                                  | 300   | fumaramidooripavine                                                                                                                                                                                                     |
| [ <sup>18</sup> F]FcyF               | -     | [ <sup>18</sup> F]cyclofoxy, 6-deoxy-6β-[ <sup>18</sup> F]fluoro-naltrexone, CAS RN: [103223-58-1]                                                                                                                      |
| FE-BPN                               |       | 6- <i>O</i> -(2-fluoroethyl)-6- <i>O</i> -desmethyl-buprenorphine                                                                                                                                                       |
| FE-DPN                               |       | 6- <i>O</i> -(2-fluoroethyl)-6- <i>O</i> -desmethyl-diprenorphine, CAS RN: [1391522-66-9]                                                                                                                               |
| FE-PEO                               |       | 6- <i>O</i> -(2-fluoroethyl)-6- <i>O</i> -desmethyl-phenethyl-orvinol                                                                                                                                                   |
| [ <sup>18</sup> F]FE-BPN             | 471   | 6- <i>O</i> -(2-[ <sup>18</sup> F]fluoroethyl)-6- <i>O</i> -desmethyl-buprenorphine                                                                                                                                     |
| [ <sup>18</sup> F]FE-DPN             | 468   | 6- <i>O</i> -(2-[ <sup>18</sup> F]fluoroethyl)-6- <i>O</i> -desmethyl-diprenorphine                                                                                                                                     |
| [ <sup>18</sup> F]FP- <i>nor</i> BPN | 467   | <i>N</i> <sup>17</sup> -(3-[ <sup>18</sup> F]fluoropropyl)- <i>nor</i> -buprenorphine                                                                                                                                   |
| [ <sup>18</sup> F]FP- <i>nor</i> DPN | 466b  | <i>N</i> <sup>17</sup> -(3-[ <sup>18</sup> F]fluoropropyl)- <i>nor</i> -diprenorphine                                                                                                                                   |
| [ <sup>18</sup> F]FE-PEO             | 470   | 6- <i>O</i> -(2-[ <sup>18</sup> F]fluoroethyl)-6- <i>O</i> -desmethyl-phenethyl-orvinol                                                                                                                                 |
| [ <sup>18</sup> F]FEOTos             | -     | 2-[ <sup>18</sup> F]fluoroethyl tosylate                                                                                                                                                                                |
| β-FNA                                | -     | β-funaltrexamine                                                                                                                                                                                                        |
| GPI                                  | -     | Guinea-pig ileum                                                                                                                                                                                                        |
| GR103545                             | -     | [(3,4-dichlorophenyl)acetyl]-(3 <i>R</i> )-(1-pyrrolidinylmethyl)-1-piperazine carboxylic acid methyl ester                                                                                                             |
| [ <sup>11</sup> C]GR103545           | -     | [(3,4-dichlorophenyl)acetyl]-(3 <i>R</i> )-(1-pyrrolidinyl methyl)-1-piperazine carboxylic acid methyl- <sup>11</sup> C ester                                                                                           |
| HATU                                 | -     | 1-[bis(dimethylamino)methylene]-1 <i>H</i> -1,2,3-triazolo[4,5- <i>b</i> ]pyridinium-3-oxide hexafluorophosphate, CAS RN: [148893-10-1]                                                                                 |
| HDA reaction                         |       | hetero Diels-Alder reaction                                                                                                                                                                                             |
| HMPA                                 |       | hexamethylphosphoramide, CAS RN: [680-31-9]                                                                                                                                                                             |
| HOMO                                 |       | highest occupied molecular orbital                                                                                                                                                                                      |
| IA-DPN                               |       | iodoallyl-diprenorphine                                                                                                                                                                                                 |
| 9-I-9BBN                             | -     | 9-iodo-9-borabicyclo[3.3.1]nonane, CAS RN: [70145-42-5]                                                                                                                                                                 |
| IDA                                  | -     | iminodiacetic acid, CAS RN: [142-73-4]                                                                                                                                                                                  |
| <i>iso</i> -BPN                      | -     | 3- <i>O</i> -methyl-6- <i>O</i> -desmethyl-buprenorphine                                                                                                                                                                |
| JDTic                                | -     | 1,2,3,4-tetrahydro-7-hydroxy- <i>N</i> -[(1 <i>S</i> )-1-[(3 <i>R</i> ,4 <i>R</i> )-4-(3-hydroxyphenyl)-3,4-dimethyl-1-piperidinyl]methyl]-2-methylpropyl]-(3 <i>R</i> )-isoquinolinecarboxamide, CAS RN: [361444-66-8] |
| κ-OR                                 | -     | κ-opioid receptor                                                                                                                                                                                                       |
| K <sub>i</sub>                       | -     | inhibition constant                                                                                                                                                                                                     |
| KHMDS                                | -     | potassium bis(trimethylsilyl)amide, CAS RN: [40949-94-8]                                                                                                                                                                |
| LDA                                  | -     | lithium diisopropylamide, LiN[CH(CH <sub>3</sub> ) <sub>2</sub> ], CAS RN: [4111-54-0]                                                                                                                                  |
| LH                                   | -     | Luteinizing hormone                                                                                                                                                                                                     |
| L-Selectride                         | -     | Lithium-tri- <i>sec</i> -butylborohydride                                                                                                                                                                               |
| LTA                                  | -     | lead tetraacetate, CAS RN: [546-67-8]                                                                                                                                                                                   |
| LUMO                                 | -     | lowest unoccupied molecular orbital                                                                                                                                                                                     |

| Compound, Term, Acronym | Comp. | Name, Synonyms                                                                                                                                                                                                                                                                                                                                 |
|-------------------------|-------|------------------------------------------------------------------------------------------------------------------------------------------------------------------------------------------------------------------------------------------------------------------------------------------------------------------------------------------------|
| M99                     | 97    | etorphine, Immobilon, CAS RN: [14521-96-1]                                                                                                                                                                                                                                                                                                     |
| M320                    | -     | isopentyl orvinol                                                                                                                                                                                                                                                                                                                              |
| mCPBA                   | -     | 3-chloroperbenzoic acid, CAS RN: [937-14-4]                                                                                                                                                                                                                                                                                                    |
| 16 $\alpha$ -Me-Cypre   | -     | 16 $\alpha$ -methylcyprenorphine, 17-cyclopropylmethyl-4,5 $\alpha$ -epoxy-3-hydroxy-6-methoxy- $\alpha,\alpha,16\alpha$ -trimethyl-6,14-etheno morphinan-7-methanol, CAS RN: [40994-80-7]                                                                                                                                                     |
| [ <sup>11</sup> C]MeNTI | -     | N1'-[ <sup>11</sup> C]methyl-naltrindole                                                                                                                                                                                                                                                                                                       |
| $\mu$ -OR               | -     | $\mu$ -opioid receptor                                                                                                                                                                                                                                                                                                                         |
| MORV                    | -     | 20-methylorvinol                                                                                                                                                                                                                                                                                                                               |
| MP                      | -     | methyl propiolate, methyl acetylenecarboxylate, CAS RN: [922-67-8]                                                                                                                                                                                                                                                                             |
| MTBD                    | -     | 1-Methyl-2,3,4,6,7,8-hexahydro-1 <i>H</i> -pyrimido[1,2- <i>a</i> ]pyrimidine CAS RN: [84030-20-6]                                                                                                                                                                                                                                             |
| MVD                     | -     | mouse vas deferens                                                                                                                                                                                                                                                                                                                             |
| Naloxone                | -     | N <sup>17</sup> -allyl-14-hydroxy-dihydromorphinone, N <sup>17</sup> -Allyl-noroxymorphone, CAS RN: [465-65-6]                                                                                                                                                                                                                                 |
| Naltrexone              | -     | N <sup>17</sup> -cyclopropylmethyl-14-hydroxy-dihydromorphinone, N <sup>17</sup> -cyclopropylmethyl-noroxymorphone, NTX, CAS RN: [16590-41-3]                                                                                                                                                                                                  |
| NBS                     | -     | N-bromosuccinimide                                                                                                                                                                                                                                                                                                                             |
| NCS                     | -     | N-chlorosuccinimide                                                                                                                                                                                                                                                                                                                            |
| NCA                     | -     | no-carrier-added                                                                                                                                                                                                                                                                                                                               |
| nepenthone              | 16b   | 7 $\alpha$ -benzoyl-4,5 $\alpha$ -epoxy-17-methyl-3,6-dimethoxy-6,14-ethenomorphinan CAS RN: [464-66-4]                                                                                                                                                                                                                                        |
| nociceptine             | -     | Phe-Gly-Gly-Phe-Thr-Gly-Ala-Arg-Lys-Ser-Ala-Arg-Lys-Leu-Ala-Asn-Gln                                                                                                                                                                                                                                                                            |
| NOP                     | -     | nociceptin/orphanin receptor                                                                                                                                                                                                                                                                                                                   |
| norBNI                  | -     | norbinaltorphimine, CAS:[105618-26-6]                                                                                                                                                                                                                                                                                                          |
| NTI                     | -     | naltrexone-indole, naltrindole, CAS RN: [111555-53-4]                                                                                                                                                                                                                                                                                          |
| ORs                     | -     | opioid receptors                                                                                                                                                                                                                                                                                                                               |
| PEO                     | -     | 20 <i>R</i> -phenethyl-orvinol, CAS RN: [14521-98-3]                                                                                                                                                                                                                                                                                           |
| [ <sup>11</sup> C]PEO   | -     | [6- <i>O</i> -methyl- <sup>11</sup> C]phenethyl-orvinol                                                                                                                                                                                                                                                                                        |
| PET                     | -     | positron emission tomography                                                                                                                                                                                                                                                                                                                   |
| PTAD                    | -     | 4-phenyl-4 <i>H</i> -1,2,4-triazoline-3,5-dione                                                                                                                                                                                                                                                                                                |
| RIA                     | -     | radioimmunoassay                                                                                                                                                                                                                                                                                                                               |
| RVD                     | -     | rat vas deferens                                                                                                                                                                                                                                                                                                                               |
| SLL-004C                | 422c  | <i>p</i> -amino-nepenthone, CAS RN: [2084834-43-3]                                                                                                                                                                                                                                                                                             |
| SLL-020ACP              | 390a  | N <sup>17</sup> -cyclopropylmethyl-nornepenthone, CAS RN: [188340-60-5]                                                                                                                                                                                                                                                                        |
| SLL-039                 | 434   | N-cyclopropylmethyl-7 $\alpha$ -[4'-( <i>N'</i> -benzoyl)amino-phenyl]-6,14-endoethano-tetrahydronorthebaine                                                                                                                                                                                                                                   |
| SLL-1206                | 437j  | N-cyclopropylmethyl-7 $\alpha$ -[3'-( <i>p</i> -methoxybenzyl)amino-phenyl]-6,14-endoethano-tetrahydronorthebaine                                                                                                                                                                                                                              |
| SLL-603                 | 430   | N <sup>17</sup> -cyclopropylmethyl-7 $\alpha$ -methyl-dihydronornepenthone CAS RN: [2246405-55-8]                                                                                                                                                                                                                                              |
| SPECT                   | -     | single-photon emission computed tomography                                                                                                                                                                                                                                                                                                     |
| TAN-821                 | 333   | 17-(cyclopropylmethyl)-4,5- $\alpha$ -epoxy-3,6-dihydroxy- <i>N</i> -methyl- <i>N</i> -(2--phenylethyl)-6,14-ethenomorphinan-7- $\alpha$ -carboxamide, CAS RN: [214064-71-8]                                                                                                                                                                   |
| TAN-1014                | 335   | (4 <i>bS</i> ,8 <i>R</i> ,8 <i>aR</i> ,9 <i>aS</i> ,13 <i>aR</i> ,13 <i>bR</i> )-7-(cyclopropylmethyl)-5,6,7,8,9,9 <i>a</i> ,11,12-octahydro-1-hydroxy-11-(2-phenylethyl)-10 <i>H</i> ,13 <i>bH</i> ,8 <i>a</i> ,13 <i>a</i> -etheno-4,8-methanobenzofuro [3,2- <i>h</i> ]pyrido[3,4- <i>g</i> ][1,3]benzoxazine-10-one, CAS RN: [757232-46-5] |
| TBDMS                   | -     | <i>tert</i> -butyldimethylsilyl group                                                                                                                                                                                                                                                                                                          |
| TBTU                    | -     | O-(Benzotriazol-1-yl)- <i>N,N,N',N'</i> -tetramethyluronium tetrafluoroborate CAS RN: [125700-67-6]                                                                                                                                                                                                                                            |
| TDBPN                   | 461b  | 3- <i>O</i> -trityl-6- <i>O</i> -desmethyl-buprenorphine, CAS RN: [157891-93-5]                                                                                                                                                                                                                                                                |
| TDDPN                   | 461a  | 3- <i>O</i> -trityl-6- <i>O</i> -desmethyl-diprenorphine, CAS RN: [157891-92-4], « <i>Luthra-precursor</i> », TDDPN was the first product of the company ABX advanced biochemical compounds Biomedizinische Forschungsreagenzien GmbH, Radeberg in 1997                                                                                        |

| Compound, Term, Acronym | Comp. | Name, Synonyms                                                                                                                                                                                                                                                               |
|-------------------------|-------|------------------------------------------------------------------------------------------------------------------------------------------------------------------------------------------------------------------------------------------------------------------------------|
| TE-TDPEO                | 469   | 6- <i>O</i> -(2-tosyloxyethyl)-6- <i>O</i> -desmethyl-3- <i>O</i> -trityl-phenethyl-orvinol, CAS RN: [1614258-10-4]                                                                                                                                                          |
| TDPEO                   | 463   | 3- <i>O</i> -trityl-6- <i>O</i> -desmethyl-phenethyl-orvionol, CAS RN: [1187551-69-4]                                                                                                                                                                                        |
| thevinone               | 16a   | 4,5 $\alpha$ -epoxy-17-methyl-3,6-dimethoxy-7 $\alpha$ -acetyl-6,14-ethenomorphinan, CAS RN: [15358-22-2]                                                                                                                                                                    |
| thienorphine            | 100   | (5 <i>R</i> ,6 <i>R</i> ,7 <i>R</i> ,9 <i>R</i> ,13 <i>S</i> ,14 <i>S</i> ,20 <i>R</i> )-17-cyclopropylmethyl-4,5 $\alpha$ -epoxy-18,19-dihydro-3-hydroxy-6-methoxy- $\alpha$ -methyl- $\alpha$ -[2-(2-thienyl)ethyl]-6,14-ethenomorphinan-7-methanol, CAS RN: [852100-94-8] |
| TMS                     | -     | trimethylsilyl group                                                                                                                                                                                                                                                         |
| TMEDA                   | -     | tetramethylethylenediamine, CAS RN: [110-18-9]                                                                                                                                                                                                                               |
| Tos                     | -     | tosyl group                                                                                                                                                                                                                                                                  |
| Tr                      | -     | trityl group; triphenylmethyl group                                                                                                                                                                                                                                          |
| Troc                    | -     | 2,2,2-trichloroethoxycarbonyl group                                                                                                                                                                                                                                          |
| TT                      | -     | tetanus oxide                                                                                                                                                                                                                                                                |
| U69,593                 | -     | (+)- <i>N</i> -methyl-2-phenyl- <i>N</i> -[(5 <i>R</i> ,7 <i>S</i> ,8 <i>S</i> )-7-pyrrolidin-1-yl-1-oxaspiro[4.5]decan-8-yl]acetamide, CAS RN: [96744-75-1]                                                                                                                 |

## 2. SUPPLEMENTARY FIGURES (to section 2.3.6.)

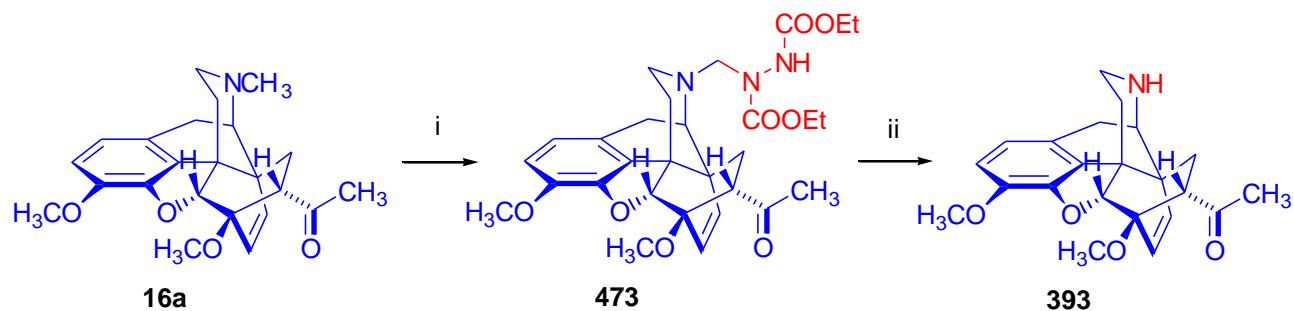

### 2.1. Figure S1 Synthesis of $^{17}\text{N}$ -northevinone

**Reagents and conditions:** (i): diethyl azodicarboxylate, benzene, reflux, 7 h; (ii): pyridinium chloride, EtOH, room temperature, 8 h

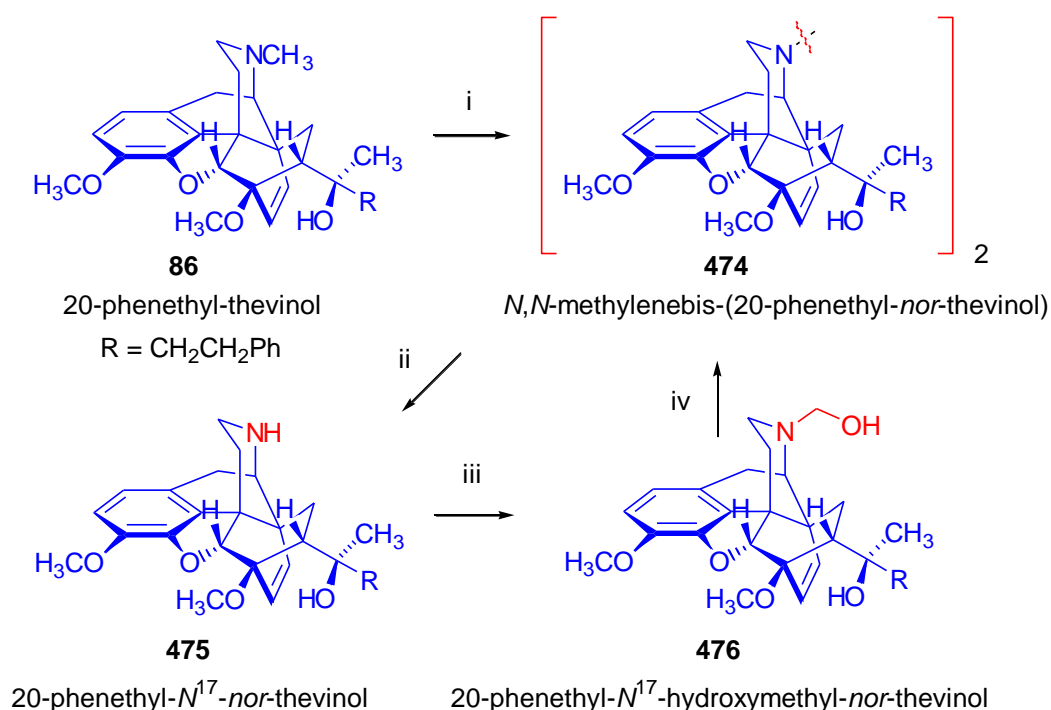

### 2.2. Figure S2 Reaction of 20-phenethyl-thevinol with diethyl azodicarboxylate

**Reagents and conditions:** (i): diethyl azodicarboxylate, acetone, reflux 1h; (ii): 6% acetic acid,  $\Delta$ ; (iii): 30% aqueous formaldehyde, EtOH, 45  $^\circ\text{C}$ , 30 min; (iv): **A.** EtOH,  $\Delta$ , or **B.** 476, EtOH,  $\Delta$

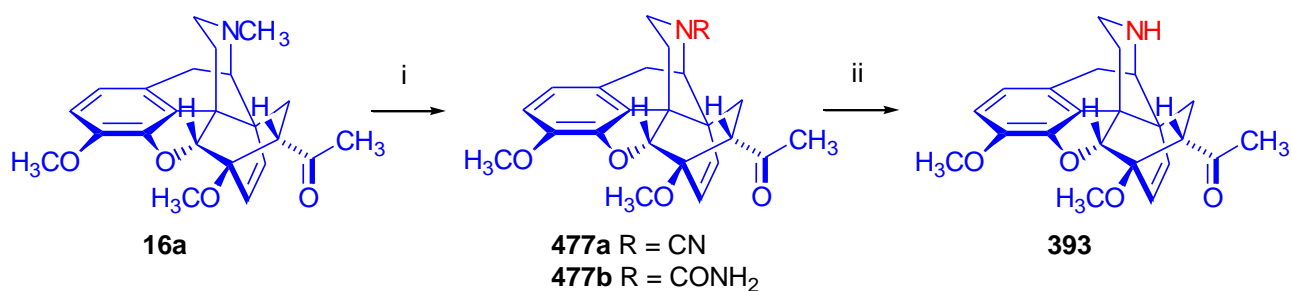

### 2.3. Figure S3 $N^{17}$ -demethylation of thevinone using the *von Braun* method

**Reagents and conditions:** (i): BrCN, CHCl<sub>3</sub>, reflux, 12 h; (ii): 2 M HCl, reflux, 2 h

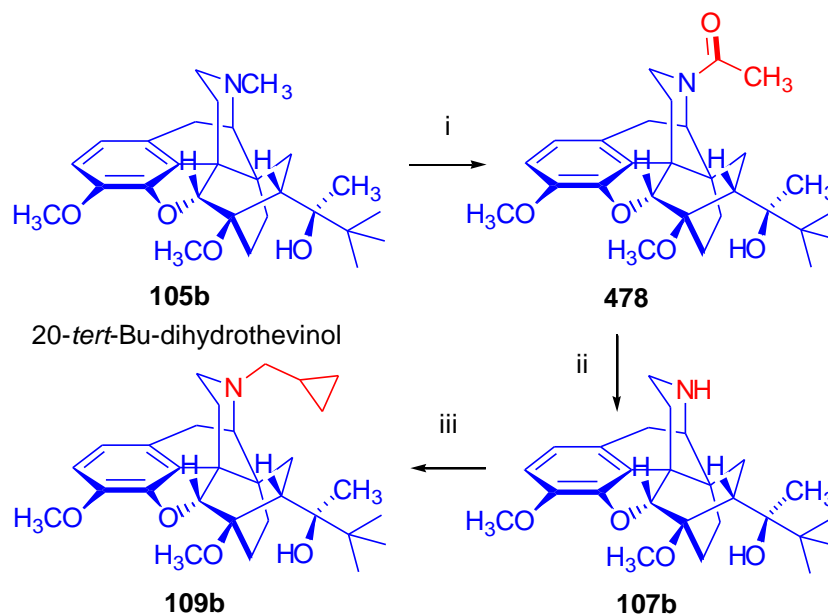

### 2.4. Figure S4 The Hudlický route for preparation of buprenorphine methylether

**Reagents and conditions:** (i): Pd(OAc)<sub>2</sub>, Cu(OAc)<sub>2</sub>, AcO, dioxane, 80 °C, air or O<sub>2</sub>, 23 h, 95 %; (ii): Schwartz reagent: chlorodicyclopentadienylhydrozirconium (Cp<sub>2</sub>ZrHCl, 3 equiv.), THF, room temperature, 40 min, 90 %; (iii): cyclopropylmethyl bromide, NaHCO<sub>3</sub>, *N*-methylpyrrolidine, 85 °C, 18 h, 88 %

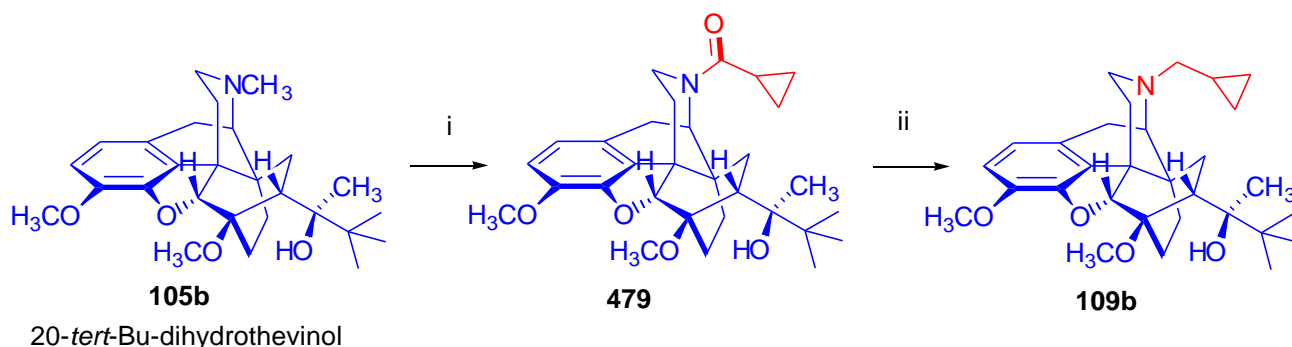

### 2.5. Figure S5 Synthesis of BPN methylether from 20-*tert*-butyl-dihydrothevinol using the *N*-demethylation/*N*-acylation reaction sequence

**Reagents and conditions:** (i): cyclopropanecarboxylic anhydride, Pd(OAc)<sub>2</sub>, air or O<sub>2</sub>, 100 °C, dioxane, 40-48 h, 90-95 %; (ii): LiAlH<sub>4</sub>, THF, 70 °C, 72 %, or Karstedt's catalyst, polymethylhydrosiloxane (PMHS), 87 %



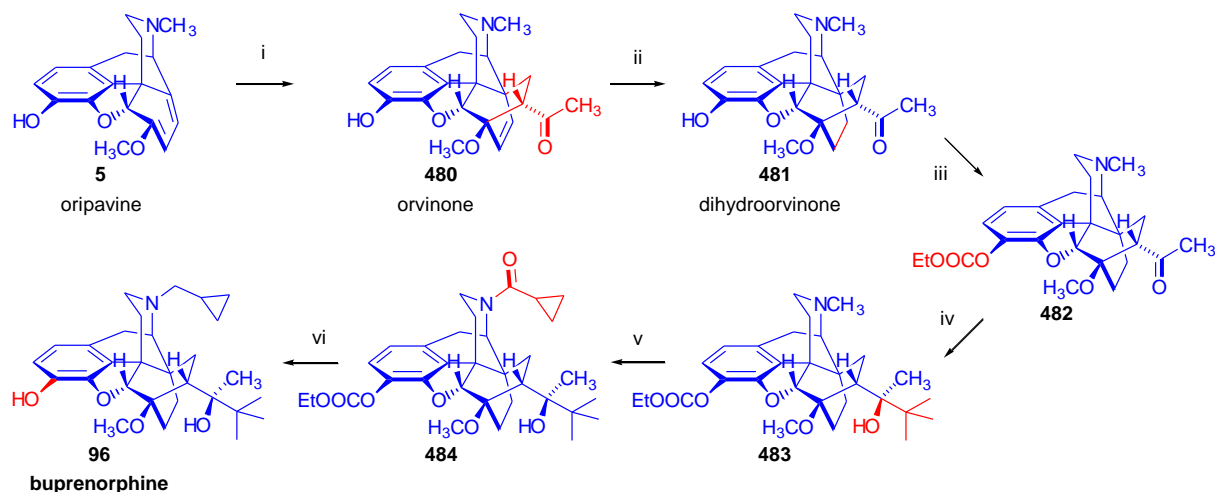

## 2.6. Figure S6 Synthesis of buprenorphine from oripavine

**Reagents and conditions:** (i): methyl vinyl ketone, toluene, 80 °C, 75%; (ii): H<sub>2</sub>, 10% Pd-C, tartaric acid, water, atmospheric pressure, 16 h, 80 °C, 84%; (iii): EtCOOCl, Et<sub>3</sub>N, toluene, 40 °C, 82%; (iv): tert-BuMgCl, cyclohexane, THF, toluene, room temperature, 71%; (v): cyclopropanecarboxylic anhydride, Pd(OAc)<sub>2</sub>, Cu(OAc)<sub>2</sub>, dioxane, O<sub>2</sub>, 80 °C, 12 h, 80%; (vi): *bis*(2-methoxyethoxy)aluminium hydride, THF, toluene, 80 °C, 30 min, 81%.

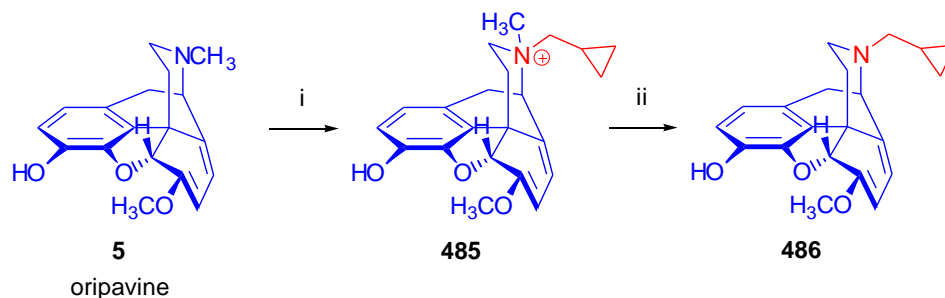

## 2.7. Figure S7 Synthesis of *N*<sup>17</sup>-cyclopropylmethyl-nororipavine from oripavine

**Reagents and conditions:** (i): cyclopropylmethyl bromide, DMF, 80 °C, 94%; tert-dodecanethiol, EtONa, DMSO, 80 °C, 53%

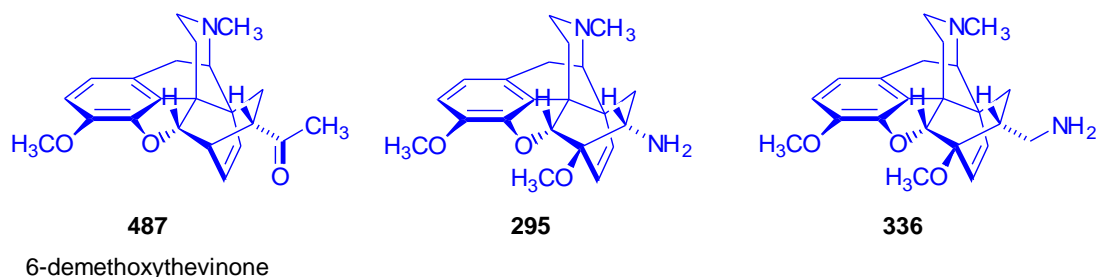

## 2.8. Figure S8 Chemical structures of non-acid-sensitive 6,14-ethenomorphinans 3-*O*-demethylated with boron tribromide
